# Supplementary material for: Establishment of a Nomogram for Predicting Early Death in Viral Myocarditis
Source: Hindawi journal article supplement (doi:10.1155/2021/9947034), 2021-05-12
Supplement: f1 [file 9947034.f1.zip]

Archive with 3 entries (3 files):
- 9947034.f1/Supplementary table 1 (Training cohort).txt
- 9947034.f1/Supplementary table 2 (Validation cohort).txt
- 9947034.f1/Supplementary table 3 (Original script) .txt
