# Supplementary material for: Establishment of a Nomogram for Predicting Early Death in Viral Myocarditis
Source: Hindawi journal article supplement (doi:10.1155/2021/9947034), 2021-05-12
Supplement: f1 [file 9947034.f1.zip › 9947034.f1/Supplementary table 2 (Validation cohort).txt]

id	Status	HF	ECG	Pneumonia	BNP	LDH	Cr
1	0	0	1	0	0	0	0
2	0	0	0	0	0	0	0
3	0	0	1	0	0	0	0
4	0	0	1	0	0	1	0
5	0	0	1	0	0	1	0
6	0	1	1	0	1	1	1
7	0	0	0	0	0	1	1
8	0	0	1	0	1	1	0
9	0	0	0	0	1	0	1
10	0	0	1	0	0	0	0
11	0	1	1	0	0	1	0
12	0	0	1	0	0	0	0
13	0	0	0	0	0	0	0
14	0	0	1	0	1	1	1
15	0	0	1	0	0	0	0
16	0	0	1	0	0	0	0
17	0	0	1	0	0	1	0
18	0	0	1	0	0	0	0
19	0	0	1	0	0	0	0
20	0	0	1	0	0	0	0
21	0	0	1	0	0	1	0
22	0	0	0	0	0	0	0
23	0	0	0	0	0	0	0
24	0	0	1	1	0	0	0
25	0	0	1	1	1	1	0
26	0	1	1	1	1	1	1
27	0	0	1	1	1	1	0
28	0	0	1	1	0	1	0
29	0	1	1	1	1	1	0
30	0	0	0	1	1	1	1
31	0	0	1	1	0	1	0
32	0	0	1	1	0	1	0
33	0	0	1	1	0	1	0
34	0	0	1	1	0	0	0
35	0	0	0	1	1	0	0
36	0	0	1	1	1	1	0
37	0	0	1	1	1	1	1
38	0	0	1	1	1	1	0
39	0	0	1	1	1	1	1
40	0	1	1	1	1	1	0
41	0	0	1	1	0	0	0
42	0	1	1	1	1	1	0
43	0	0	1	1	1	1	0
44	0	0	1	1	1	1	0
45	0	0	1	1	1	1	0
46	0	0	0	0	0	0	0
47	0	0	1	0	0	0	0
48	0	0	1	0	1	0	0
49	0	0	0	0	0	1	0
50	0	0	0	0	0	0	0
51	0	0	0	0	0	0	0
52	0	0	1	0	1	1	0
53	0	0	1	0	1	1	0
54	0	0	0	0	1	1	0
55	0	0	0	0	0	0	0
56	0	0	1	0	0	0	0
57	0	0	0	0	0	0	0
58	0	0	1	0	1	1	0
59	0	0	1	0	1	1	0
60	0	0	1	0	0	0	0
61	0	0	1	0	0	0	0
62	0	0	0	0	0	0	0
63	0	0	0	0	0	1	0
64	0	0	0	0	1	0	0
65	0	0	1	0	0	1	0
66	0	0	1	0	0	1	0
67	0	0	1	0	0	0	0
68	0	0	0	0	0	0	0
69	0	0	1	0	0	0	0
70	0	0	0	0	0	0	0
71	0	0	0	0	0	0	0
72	0	0	0	0	0	1	0
73	0	0	1	0	1	1	0
74	0	0	1	0	0	1	0
75	0	0	1	0	1	1	0
76	0	0	1	0	0	0	0
77	0	0	1	0	1	1	0
78	0	0	1	0	1	1	0
79	0	0	1	0	1	1	0
80	0	0	0	0	0	1	0
81	0	0	1	0	1	1	0
82	0	0	1	0	1	1	0
83	0	0	0	0	0	0	0
84	0	0	0	0	0	0	0
85	0	0	0	0	0	1	0
86	0	1	1	0	1	1	0
87	0	0	1	0	0	0	0
88	0	0	1	0	0	0	0
89	0	0	1	0	0	0	0
90	0	0	1	0	1	1	0
91	0	0	1	0	0	1	0
92	0	0	1	0	0	0	0
93	0	1	1	1	1	1	0
94	0	0	1	0	0	0	0
95	0	0	0	0	0	1	0
96	0	0	1	1	0	1	1
97	0	0	1	1	0	1	1
98	0	0	1	0	0	1	0
99	1	0	1	1	0	1	0
100	1	0	1	1	1	1	1
101	1	1	1	1	1	0	1
102	1	0	1	1	1	1	0
103	1	0	1	1	1	1	1
104	1	1	1	1	1	0	0
105	1	1	1	1	1	1	0
106	1	0	1	0	1	1	1
107	1	0	1	0	1	1	1
108	1	1	1	1	1	1	1
