# Supplementary material for: Establishment of a Nomogram for Predicting Early Death in Viral Myocarditis
Source: Hindawi journal article supplement (doi:10.1155/2021/9947034), 2021-05-12
Supplement: f1 [file 9947034.f1.zip › 9947034.f1/Supplementary table 3 (Original script) .txt]

1_lasso analysis

library(glmnet)

setwd("C:\\Users\\Desktop\\Viral-myocarditis") 
mydata<-read.table("input.txt",header=T,sep="\t") 

v1<-as.matrix(mydata[,c(3:29)]) 
v2 <-mydata[,2]
myfit <- glmnet(v1, v2, family = "binomial")
pdf("lambda.pdf")
plot(myfit, xvar = "lambda", label = TRUE)
dev.off()

myfit2 <- cv.glmnet(v1, v2, family="binomial")
pdf("min.pdf")
plot(myfit2)
abline(v=log(c(myfit2$lambda.min,myfit2$lambda.1se)),lty="dashed")
dev.off()

myfit2$lambda.min
coe <- coef(myfit, s = myfit2$lambda.min)
act_index <- which(coe != 0)
act_coe <- coe[act_index]
row.names(coe)[act_index]

________________________________________________________________


2_Nomogram script
library(rms)


setwd("C:\\Users\\Desktop\\VMD(Final version-3)\\dev\\3_Nom")

non_tumor<-read.table("input.txt",header=T,sep="\t")

non_tumor$HF<-factor(non_tumor$HF,labels=c("No","Yes"))
non_tumor$ECG<-factor(non_tumor$ECG,labels=c("Normal","Abnormal"))
non_tumor$Pneumonia<-factor(non_tumor$Pneumonia,labels=c("No","Yes"))
#non_tumor$Lymphocyte<-factor(non_tumor$Lymphocyte,labels=c("Normal",">3.2*10^9/L"))
non_tumor$BNP<-factor(non_tumor$BNP,labels=c("<500pg/L",">=500pg/L"))
non_tumor$Cr<-factor(non_tumor$Cr,labels=c("<110umol/L",">110umol/L"))
non_tumor$LDH<-factor(non_tumor$LDH,labels=c("<300U/L",">=300U/L"))

ddist <- datadist(non_tumor)
options(datadist="ddist")

mylog<-lrm(Status~HF + ECG + Pneumonia + BNP + Cr + LDH,data=non_tumor,x=T,y=T)
mynom<- nomogram(mylog, fun=plogis,fun.at=c(0.0001,0.1,0.2,0.3,0.4,0.5,0.6,0.7,0.8,0.9,0.9999),lp=F, funlabel="Risk of early death")


pdf("Nom.pdf",10,8)
plot(mynom)
dev.off()

____________________________________________________________


3_Decision curve analysis
library(rms)
library(rmda)

setwd("C:\\Users\\Desktop\\VMD(Final version-3)\\dev\\7_DCA")

non_tumor<-read.table("input.txt",header=T,sep="\t")

modul<- decision_curve(Status~HF + ECG + Pneumonia + BNP + Cr + LDH,data= non_tumor, 
                       family = binomial(link ='logit'),
                       thresholds= seq(0,1, by = 0.01),
                       confidence.intervals = 0.95)

pdf("DCA.pdf")
plot_decision_curve(modul,
                    curve.names="Death prediction nomogram",xlab="Threshold probability",
                    cost.benefit.axis =FALSE,col= "blue",
                    confidence.intervals=FALSE,
                    standardize = FALSE)
dev.off()

modul
